# Supplementary material for: Preparation of garlic-straw biochar-based surface molecularly imprinted polymers for solid-phase extraction of neonicotinoid insecticides from agricultural products
Source: Royal Society of Chemistry journal article supplement (doi:10.1039/d5ay01561h), 2025-12-03
Supplement: d5ay01561h1.pdf [file d5ay01561h1.pdf]

# Preparation of garlic-straw biochar-based surface molecularly imprinted polymers for solid-phase extraction of neonicotinoid insecticides from agricultural products

Shuang Cong<sup>a\*</sup>, Xinyu Zhang<sup>a\*</sup>, Meiyu Wang<sup>a</sup>, Meijin Lv<sup>a</sup>, Hongping Tian<sup>b</sup>, Ziping Zhang<sup>a</sup>,  
Xiaolin Cao<sup>a\*</sup>

[a] College of Life Science, Yantai University, Yantai 264005, P. R. China

[b] Institute of Plant Protection, Weifang Academy of Agricultural Sciences, Weifang 261071,  
P. R. China

**\*Co-first author**

**\*Corresponding author:**

Xiaolin Cao, College of Life Science, Yantai University, Yantai 264005, P. R. China

Email: aicaoxiaolin@126.com

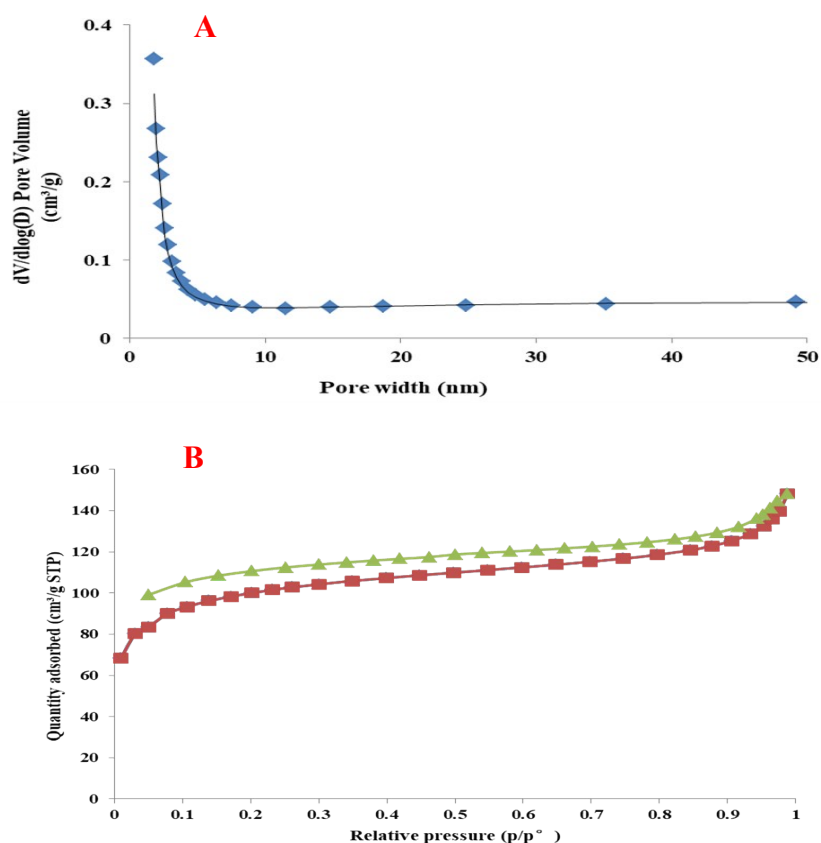

Fig. S1 Pore size distribution (A) and nitrogen adsorption-desorption isotherms of GSBC@MIPs (B)

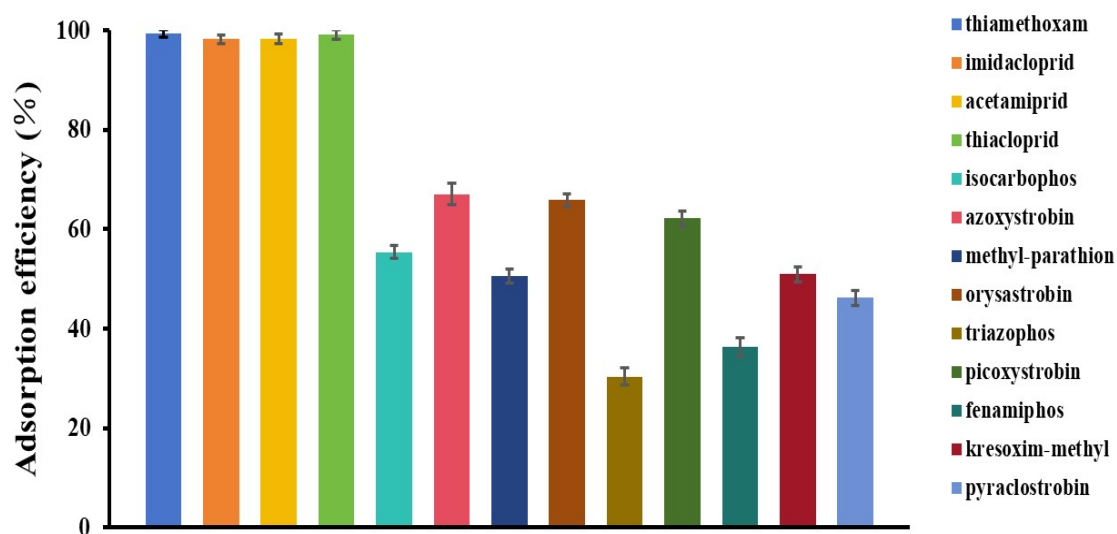

Fig. S2 Adsorbing efficiency of GSBC@MIPs towards different pesticides

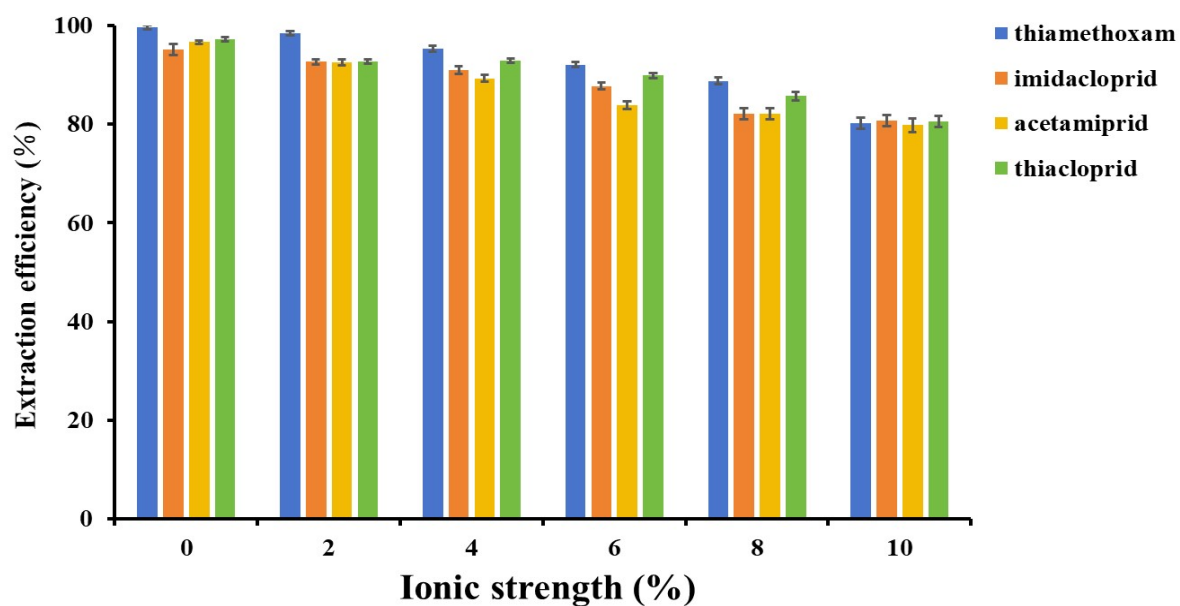

Fig. S3 Effects of ionic strength (NaCl%) on extraction efficiency

Table S1. The detected residual NEOs in real fruits and vegetable samples

| Analytes<br>(ng g <sup>-1</sup> ) | Sample |       |      |          |       |         |
|-----------------------------------|--------|-------|------|----------|-------|---------|
|                                   | Tomato | Apple | Pear | Cucumber | Grape | Cabbage |
| Thiamethoxam                      | ND     | ND    | ND   | ND       | ND    | ND      |
| Imidacloprid                      | 0.021  | ND    | ND   | ND       | ND    | ND      |
| Acetamiprid                       | ND     | ND    | ND   | ND       | ND    | ND      |
| Thiacloprid                       | ND     | 0.089 | ND   | ND       | ND    | ND      |

ND, not detected.
